# Supplementary material for: Demographic, exposure and clinical characteristics in a multinational registry of engineered stone workers with silicosis
Source: PubMed Central journal article supplement — Occup Environ Med. 2022 May 3;79(9):586–93. doi: 10.1136/oemed-2021-108190 (PMC9453561; doi:10.1136/oemed-2021-108190), 2022-05-03
Supplement: oemed-2021-108190supp001.pdf [file oemed-2021-108190supp001.pdf]

**Supplemental Table 1: Frequency of autoimmune conditions by country**

|                                                                        | Overall   | Australia | Israel    | Spain   | U.S.     |
|------------------------------------------------------------------------|-----------|-----------|-----------|---------|----------|
|                                                                        | N=154     | N=14      | N=110     | N=20    | N=10     |
| <b>Autoimmune disease findings, n (%)</b>                              |           |           |           |         |          |
| Overall                                                                | 33 (21.4) | 7 (50.0)  | 22 (20.0) | 1 (5.0) | 3 (30.0) |
| Rheumatoid arthritis                                                   | 9 (5.8)   | 0 (0.0)   | 6 (5.5)   | 0 (0.0) | 3 (30.0) |
| Systemic sclerosis                                                     | 7 (4.6)   | 0 (0.0)   | 7 (6.4)   | 0 (0.0) | 0 (0.0)  |
| Psoriasis/psoriatic arthritis                                          | 6 (3.9)   | 0 (0.0)   | 6 (5.5)   | 0 (0.0) | 0 (0.0)  |
| Abnormal autoimmune serology without a definitive autoimmune diagnosis | 7 (4.5)   | 7 (50.0)  | 0 (0.0)   | 0 (0.0) | 0 (0.0)  |
| Other**                                                                | 8 (5.2)   | 0 (0.0)   | 7 (6.4)   | 1 (5.0) | 0 (0.0)  |

\*\*Other includes: Sjogren's syndrome, anti-neutrophil cytoplasmic autoantibody (ANCA) vasculitis, mixed connective tissue disease, cicatricial pemphigoid (rheumatic), systemic lupus erythematosus, or palindromic rheumatism.
